# Supplementary material for: Esophageal cancer health videos on TikTok: A cross-sectional assessment of information coverage, quality and transmissibility
Source: Research Square preprint supplement (doi:10.21203/rs.3.rs-8165350/v1), 2026-01-28
Supplement: Supplementary file 1 [file 49a27ec5525b032f3dd126cb.docx]

**Table 1** Characteristics of the videos in TikTok.

| **Source of videos** | **Number of likes, median (IQR)** | **Number of comments, median (IQR)** | **Number of collections, median (IQR)** | **Number of shares, median (IQR)** | **Days since upload, median (IQR)** | **Video duration (seconds), median (IQR)** |
| --- | --- | --- | --- | --- | --- | --- |
| **Individual users** | | | | | | |
| Doctors specializing in esophageal cancer (n=56) | 452 (204, 1077.25) | 57 (22, 214.5) | 121 (54, 388.5) | 100 (39.5, 451.75) | 171.5 (65.5, 407.75) | 59 (42.5, 99.5) |
| Doctors in other specialized fields (n=35) | 298 (136, 792) | 28 (15, 122) | 98 (28, 339) | 83 (30, 344) | 334 (97, 610) | 72 (44,109) |
| Patients (n=2) | 742 | 110.5 | 99 | 75.5 | 242 | 61.5 |
| **Organizational users** | | | | | | |
| Public hospitals (n=2) | 1467 | 284 | 538 | 376.5 | 179.5 | 74.5 |
| News media agencies (n=5) | 2565 (1020, 6960) | 388 (122, 1055.5) | 411 (203.5, 1642.5) | 5123 (830, 6157) | 84 (76, 933) | 41 (20.5, 47.5) |
| Overall | 467 (156.75, 467) | 48.5 (16.25, 206.5) | 121 (39, 388.5) | 93.5 (35.5, 462.75) | 206 (73.25, 443.75) | 59 (42, 98) |
| P-value | 0.730 | 0.385 | 0.241 | 0.005***** | 0.905 | 0.756 |

*** Significant at **P < 0.05****

**Table 2.** Spearman correlation analysis between the video variables.

| **Variable** | **Likes** | **Comments** | **Collections** | **Shares** | **Days since upload** | **Video duration** |
| --- | --- | --- | --- | --- | --- | --- |
| **Likes** |  |  |  |  |  |  |
| *r* | 1 | —a | — | — | — | — |
| *P value* | — | — | — | — | — | — |
| **Comments** |  |  |  |  |  |  |
| *r* | .885 | 1 | — | — | — | — |
| *P value* | <0.001* | — | — | — | — | — |
| **Collections** |  |  |  |  |  |  |
| *r* | .941 | .849 | 1 |  | — | — |
| *P value* | <0.001* | <0.001* | — | — | — | — |
| **Shares** |  |  |  |  |  |  |
| *r* | .879 | .810 | .892 | 1 | — | — |
| *P value* | <0.001* | <0.001* | <0.001* | — | — | — |
| **Days since upload** |  |  |  |  |  |  |
| *r* | -.015 | .005 | -.084 | .080 | 1 | — |
| *P value* | .882 | .958 | .408 | .429 | — | — |
| **Video duration** |  |  |  |  |  |  |
| *r* | .258 | .191 | .267 | .232 | -.031 | 1 |
| *P value* | .009* | .057 | .007* | .020* | .763 | — |

***Significant at **P < 0.05****

**aNot applicable**

**Table 3.** Spearman correlation analysis between video variables and the global quality scores and DISCERN scores.

| **Variable** | **Global quality score** | **DISCERN** |
| --- | --- | --- |
| **Likes** |  |  |
| *r* | 0.290 | 0.340 |
| *P value* | < 0.001* | < 0.001* |
| **Comments** |  |  |
| *r* | 0.170 | 0.190 |
| *P value* | 0.090 | 0.060 |
| **Shares** |  |  |
| *r* | 0.250 | 0.290 |
| *P value* | 0.010* | <0.001* |
| **Saves** |  |  |
| *r* | 0.290 | 0.350 |
| *P value* | 0.001* | <0.001* |
| **Days since published** |  |  |
| *r* | -0.150 | -0.100 |
| *P value* | 0.130 | 0.300 |
| Duration |  |  |
| *r* | 0.310 | 0.150 |
| *P value* | <0.001* | 0.140 |

*** Significant at **P < 0.05****
